# Supplementary material for: Liquid Zener diodes
Source: Royal Society of Chemistry journal article supplement (doi:10.1039/d4mh00688g), 2024-01-01
Supplement: d4mh00688g1.pdf [file d4mh00688g1.pdf]

## Supporting Information

### Liquid Z-diode

*Camilla Sammartino, Bat-El Pinchasik\**

C. Sammartino, B.-E. Pinchasik  
Tel-Aviv University  
School of Mechanical Engineering  
Faculty of Engineering  
6997801  
Tel-Aviv, Israel

B.-E. Pinchasik  
Center for Physics and Chemistry of Living Systems, Tel Aviv University, Tel Aviv 69978,  
Israel

**Corresponding authors' address**  
[pinchasik@tauex.tau.ac.il](mailto:pinchasik@tauex.tau.ac.il)

**Video S1.** Local break of diodicity and stepwise propagation of the liquid front in response to compression in flexible liquid diodes.

**Video S2.** Microscopic imaging of compression actuated local break of diodicity mechanism in liquid diodes.

**Video S3.** Microscopic imaging of the mechanism of upward bending actuated local break of diodicity mechanism in liquid diodes.

**Video S4-S6.** Controlled actuation of mixing in a model system of microreactor made of a row of liquid diodes Video S4: mixing initiation on the left, following forward flow. Video S5: mixing initiation in the middle, following forward flow and timed mechanically actuated reverse flow. Video S6: mixing initiation on the right, following mechanically actuated reverse flow and halted forward flow.

**Video S7.** “X” compression, parallel to the flow direction, in a row of flexible liquid diodes, showing no effect.

**Video S8.** Sequence dependent fluidic pathway in L-shaped design, under “YX” compression sequence.

**Video S9.** Sequence dependent fluidic pathway in L-shaped design, under “XY” compression sequence, showing a different final state.

**Video S10.** Compression with acceleration on the diode's walls of  $46 \text{ mm/s}^2 \pm 9 \text{ mm/s}^2$ , resulting in a stable diode and no reverse flow.

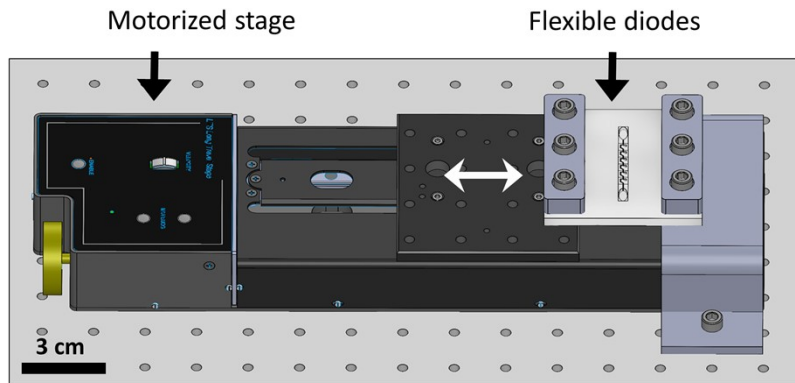

**Figure S1.** A motorized stage is used to apply reversible compression on the flexible liquid diodes. The sample can be rotated by 90 degrees.

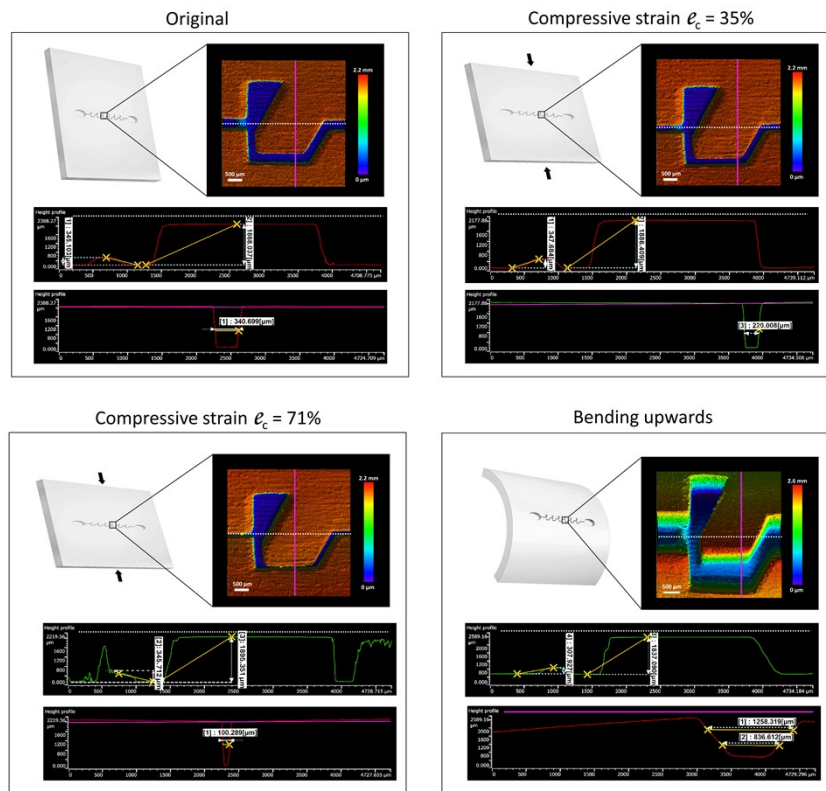

**Figure S2.** A three-dimensional quantitative description of the flexible liquid diodes under different degrees of compression and bending using high-resolution confocal microscopy. Strain during compression is defined as  $\epsilon_c = |l - l_0|/l_0$ , with  $l$ - the length under compression and  $l_0$ - the original length.
